# Supplementary material for: Chagas Disease Maternal Seroprevalence and Maternal–Fetal Health Outcomes in a Parturition Cohort in Western El Salvador
Source: MDPI journal article supplement (doi:10.3390/tropicalmed8040233), 2023-04-20
Supplement: s1 [file s1]

Supplementary Table S1: Targeted sequences used in digital PCR for molecular *T. cruzi* detection.

| Oligonucleotide  | Sequence 5'-3'                    |
|------------------|-----------------------------------|
| Cruzi 1          | ASTC-GGCT-GATC-GTTT-TCGA          |
| Cruzi 2          | AATT-CCTC-CAAG-CAGC-GGAT-A        |
| Cruzi 3          | FAM-CACACACTGGACACCAA-NFQ-MGB     |
| HsRPP30- Forward | AGATTGGACCTGCGAGCG                |
| HsRPP30- Reverse | GAGCGGCTGTCTCCACAAGT              |
| HsRPP30-Probe    | Hex-TTCTGACCTGAAGGCTCTGCGCG-Qsy-7 |

Número de identificación del estudio: \_\_\_\_\_

**Prevalencia y Factores de Riesgo de la Enfermedad de Chagas Congénito en mujeres embarazadas en zonas Endémicas en El Salvador.**

*Gracias por su tiempo y participación. La meta de nuestra investigación es poder comprender con qué frecuencia las mujeres en estado de embarazo transmiten la Enfermedad de Chagas a sus hijos y cuáles son los factores de riesgo por infección entre mujeres gestación. Solo debe responder las preguntas que usted elija.*

**Fecha de la Entrevista:** \_\_\_\_\_ **Entrevistador:** \_\_\_\_\_

**Nombre completo de la Mamá:** \_\_\_\_\_

**Fecha de nacimiento:** \_\_\_\_\_ **Ciudad y país de nacimiento:** \_\_\_\_\_

**Dirección:** \_\_\_\_\_ **Departamento:** \_\_\_\_\_

**Municipio:** \_\_\_\_\_ **Cantón:** \_\_\_\_\_

**Caserío:** \_\_\_\_\_ **Número de teléfono:** \_\_\_\_\_

**Correo electrónico:** \_\_\_\_\_

**Nombre completo del Papá:** \_\_\_\_\_

**Número de teléfono:** \_\_\_\_\_

**Dirección (si es diferente de la anterior):** \_\_\_\_\_

**Correo electrónico:** \_\_\_\_\_

**Otro número de contacto (si tiene):**

*Contacto (nombre y número de teléfono):* \_\_\_\_\_

*Relación con usted:* \_\_\_\_\_

**Resultados de indicadores de preeclampsia**

**Presión:** \_\_\_\_\_ / \_\_\_\_\_

**Tiras de prueba de orina por proteinuria :**    *Positivo*                      *Negativo*

**Tiras de prueba de orina por glucosuria :**    *Positivo*                      *Negativo*

**Notas:**

**Sección 1: Embarazo Actual /Historia Clínica y Demográfico**

- 1.) ¿Cuál es la fecha de nacimiento de la mamá (día, mes, año)? \_\_\_\_\_
- 2.) ¿Cuál es la estatura de la mamá? \_\_\_\_\_
- 3.) ¿Cuál es el peso de la mamá? \_\_\_\_\_
- 4.) ¿Cuál es su probable fecha de parto? \_\_\_\_\_
- 5.) ¿Cuál es su probable lugar donde dará a luz? \_\_\_\_\_
- 5.a) Dirección, Municipio, Cantón, Caserío \_\_\_\_\_
- 6.) ¿Planeas amamantar al bebé? \_\_\_\_\_
- 6.a) ¿por cuánto tiempo? \_\_\_\_\_
- 7.) ¿Cuántas veces ha estado embarazada? \_\_\_\_\_
- 8.) ¿Cuántos bebés ha tenido? \_\_\_\_\_
- 9.) ¿Has estado embarazada en los últimos 18 meses?      *Sí*                      *No*
- 10.) Control prenatal en: 1<sup>st</sup> Trimestre: \_\_\_\_\_ 2<sup>nd</sup> Trimestre: \_\_\_\_\_ 3<sup>rd</sup> Trimestre: \_\_\_\_\_
- 11.) ¿Ha tenido COVID en algún momento durante su embarazo? \_\_\_\_\_
- 12.) ¿Su embarazo es de alto riesgo?                      *Sí*                      *No*
- 13.) ¿Tiene complicaciones en el embarazo?                      *Sí*                      *No*
- 13a.) *Sí, ¿cuáles?*
- preeclampsia                      hipertensión gestacional                      diabetes prenatal                      asma*
- uso de tabaco                      uso de otras drogas o alcohol                      restricción intrauterina crecimiento*
- presión arterial                      recuento de plaquetas                      proteinuria                      cardiomiopatía*
- obesidad                      insuficiencia de cérvix                      depresión                      inflamación de las glándulas*
- Otro: \_\_\_\_\_
- 14.) ¿Ha tenido alguna complicación en embarazos anteriores?                      *Sí*                      *No*
- 14a.) *Si es así, ¿qué complicaciones?* \_\_\_\_\_
- 15.) ¿Alguna vez ha recibido una transfusión sanguínea?                      *Sí*                      *No*
- 15a.) *De responder sí, ¿en qué año y lugar (ciudad/estado/país y cuántas veces)?* \_\_\_\_\_
- 16.) ¿Alguna vez ha recibido algún trasplante de tejidos u órganos?                      *Sí*                      *No*
- 16a.) *De responder sí, ¿dónde y cuándo?* \_\_\_\_\_
- 17.) ¿Con qué frecuencia experimenta inflamación o hinchazón en los pies?
- rara vez                      algunas veces                      nunca*
- 18.) ¿Con frecuencia experimenta dificultad para respirar cuando se acuesta?
- rara vez                      algunas veces                      nunca*
- 19.) ¿Con frecuencia experimenta problemas para subir escaleras?
- rara vez                      algunas veces                      nunca*

20.) ¿Con frecuencia experimenta que su corazón se acelera cuando está descansando?

*rara vez                      algunas veces                      nunca*

21.) ¿Alguna vez un doctor le ha dicho que el latido de su corazón no es normal?                      *Si                      No*

22.) ¿Cuándo fue la última vez que tu fue a la clínica / médico? \_\_\_\_\_

23.) ¿Cuándo fue la última vez que tu fue al dentista? \_\_\_\_\_

24.) ¿Cuántas veces se enfermó el año pasado (visitas que realizo al médico, etc.)?

*pocas veces                      ninguna vez                      Describir: \_\_\_\_\_*

25.) ¿Cuál es su estado civil?

*Soltera                      Casada                      Acompañada                      Divorciada                      Otros*

26.) ¿Cuál es el nivel de educación de la mamá?

*Ninguno                      Básico                      Tercer Ciclo                      Bachillerato                      Universitario*

27.) ¿Cuál es el nivel de educación del papá?

*Ninguno                      Básico                      Tercer Ciclo                      Bachillerato                      Universitario*

28.) ¿Cuál es su ocupación actual de la mamá

*Estudiante                      Empleada                      Ama de Casa                      Otro \_\_\_\_\_*

29.) ¿Cuál es su ocupación actual del papá?

*Estudiante                      Agricultor                      Obrero                      Empleado                      Otro \_\_\_\_\_*

30.) ¿Cuántos hijos tiene usted? \_\_\_\_\_

31.) ¿Cuántos de sus hijos asisten a la escuela? \_\_\_\_\_

32.) ¿Con qué frecuencia te preocupas al saber de dónde vendrá los alimentos en el siguiente tiempo de comida para tu familia?

*Nunca                      A Veces                      A Menudo                      Siempre*

33.) En el último mes, ¿Cuántos Días ha faltado Alimentos para su familia? \_\_\_\_\_ Días.

34.) ¿Normalmente come *los tres tiempos* de comida al día?                      *Sí                      No                      A veces*

35.) En el último mes, ¿Su familia comió los mismos alimentos todos los días?                      *Sí                      No*

35a.) ¿Qué comía o come *normalmente* su familia? \_\_\_\_\_

36.) En las últimas dos semanas, ¿con qué frecuencia se ha sentido estresado o preocupado?

*Casi Siempre                      Algunas Veces                      Nunca*

36a.) ¿Por qué estas estresado?

*Alimentación                      Inseguridad                      Salud*

*Dinero                      Violencia/Crimen                      Otros: \_\_\_\_\_*

37.) ¿Te Preocupa la seguridad / Inseguridad de su caserío?                      *Sí                      No*

37a.) ¿Cuáles son sus preocupaciones específicas? \_\_\_\_\_

38.) ¿Preocupa de la seguridad en casa?                      *Sí                      No*

38a.) ¿Cuáles son sus preocupaciones específicas? \_\_\_\_\_

39.) A lo largo de su vida, ¿Ha experimentado alguna vez violencia con alguna pareja o esposo?

*Sí*

*No*

39a.) ¿Cuántas veces lo experimentado esto?

*1-2 veces*

*5-10 veces*

*Más de 10 veces*

## **Sección 2: Descripción de Familia, Hogar y Vivienda**

40.) ¿Cuántas personas de cada grupo de edades viven en su casa?

¿niños <5 años? \_\_\_\_\_

¿adultos mayores de 40 años? \_\_\_\_\_

¿niños 5-17 años? \_\_\_\_\_

¿embarazadas? \_\_\_\_\_

¿adultos jóvenes 18-40 años? \_\_\_\_\_

¿personas en total? \_\_\_\_\_

41.) El año pasado alguien de su familia ha experimentado:

41a.) ¿Roncha grande en el cuerpo que dura más de una semana?

*Sí*

*No*

41b.) ¿Erupción manchada en el cuerpo que dura más de una semana?

*Sí*

*No*

41c.) ¿Una picadura de insecto que produjo una costra notablemente grave?

*Sí*

*No*

41d.) ¿Una Fiebre Intermitente?

*Sí*

*No*

42.) ¿Conocen la Enfermedad de Chagas?

*Sí*

*No*

42a.) ¿Que conoce de la enfermedad de Chagas? \_\_\_\_\_

43.) ¿Conoces a alguna persona que ha tenido o tiene la Enfermedad de Chagas?

43a.) ¿Quién? \_\_\_\_\_

44.) ¿Conoces cómo se enferma una persona de la Enfermedad de Chagas?

*Sí*

*No*

44a.) ¿Como se transmite la enfermedad de Chagas? \_\_\_\_\_

45.) ¿Si usted se da cuenta que su hijo tiene la Enfermedad de Chagas, buscaría ponerlo en tratamiento?

*Sí*

*No*

46.) ¿Qué enfermedades padecen sus familiares que habitan en su mismo hogar? \_\_\_\_\_

47.) ¿Qué tipo de paredes tiene la casa?

*adobe*

*bloque*

*ladrillo*

*bajareque*

*madera*

*piso de tierra*

*bahareque*

*sin pared*

*otro: ¿cuál?* \_\_\_\_\_

48.) ¿Qué tipo de repello tiene la casa?

*repello con cemento*

*repello con lodo/con tierra*

*parcialmente repellido*

*sin repello*

49.) ¿Qué tipo de techo tiene la casa?

*paja*

*palma*

*lamina*

*duralita*

*zinc*

*madera*

*Tejado*

*otro: ¿cuál?* \_\_\_\_\_

50.) ¿Qué tipo de piso tiene la casa?

*tierra*

*cemento*

*baldosa*

*madera*

*piso cerámico*      *otro: ¿cuál?* \_\_\_\_\_

51.) ¿Cuáles estructuras adicionales tiene la casa?

*gallinero*      *bodega*      *porqueriza*      *horno/cocina de leña*  
*conejera*      *trapiche*      *ninguno*      *otro: ¿cuál?* \_\_\_\_\_

52.) ¿Qué tipo de agua usa en su casa?

*potable*      *de pozo*      *nacimiento*      *río*      *otro: ¿cuál?* \_\_\_\_\_

53.) ¿Qué tipo de baño tienen?

*de lavar*      *letrina*      *no tengo*      *otro: ¿cuál?* \_\_\_\_\_

54.) ¿Presencia de grietas en las paredes?      *Sí*      *No*

55.) ¿Cuántas focos tiene al interior de la casa? \_\_\_\_\_ alrededor de la casa? \_\_\_\_\_

56.) ¿De qué vive económicamente la familia (agricultura, comercio, empresa, remesa, otro)?

57.) ¿Cuántas camas hay en la casa? \_\_\_\_\_

58.) ¿Están las paredes del dormitorio repellada?      *Sí*      *No*

59.) ¿Hay ventana en la habitación?      *Sí*      *No*

60.) ¿Tiene energía eléctrica?      *Sí*      *No*

61.) ¿Qué tipo de cocina posee?

*gas*      *leña*      *ambos*      *otro: ¿cuál?* \_\_\_\_\_

62.) ¿Tienes refrigerador que funcione en la casa?      *Sí*      *No*

62a.) ¿Dónde guardas tu comida? \_\_\_\_\_

### **Sección 3: Vectores**

63.) ¿Qué tipo de insectos vio adentro o cerca de su casa?

*mosquitos*      *garrapatas*      *pulgas*      *chinchas*  
*arañas*      *mosca*      *ninguna*      *otro: ¿cuál?* \_\_\_\_\_

64.) ¿Alguna vez ha visto insectos llenos de sangre adentro o cerca de su casa?      *Sí*      *No*

64a.) ¿Si dicen que sí, alguna vez los vio en animales o en un miembro de su familia?      *Sí*      *No*

64b.) ¿Cuáles insectos? \_\_\_\_\_

65.) ¿Si usted observara un insecto en su vivienda que hace?

*ignorarlos*      *utiliza algún objeto para matar el insecto*  
*lo elimina manualmente*      *lo captura y lo deposita en la basura*  
*lo quema*      *recolecta el insecto y reporta su presencia a un ente encargado*  
*otro: ¿otra acción?* \_\_\_\_\_

66.) ¿Conocen las chinchas?:      *Sí*      *No*

66a.) ¿En el último año han visto chinchas dentro o alrededor de su casa?:      *Sí*      *No*

66b.) ¿En qué sitio ha visto estos insectos?:

Número de identificación del estudio: \_\_\_\_\_

Intradomicilio: Espacio donde duerme la gente, parte interna de la casa

|                 |                   |                 |                           |
|-----------------|-------------------|-----------------|---------------------------|
| <i>cocina</i>   | <i>dormitorio</i> | <i>sala</i>     | <i>comedor</i>            |
| <i>pasillos</i> | <i>baños</i>      | <i>corredor</i> | <i>otro: ¿cuál? _____</i> |

Peridomicilio: alrededor de la casa, fuera del techo de la casa

|                      |                         |               |                                 |
|----------------------|-------------------------|---------------|---------------------------------|
| <i>gallinero</i>     | <i>bodega</i>           | <i>monte</i>  | <i>material de construcción</i> |
| <i>pante de leña</i> | <i>en indos de aves</i> | <i>cactus</i> | <i>otro: ¿cuál? _____</i>       |

Extra-domicilio: Área por fuera del ámbito de actividades cotidianas de los habitantes

|                 |               |                           |
|-----------------|---------------|---------------------------|
| <i>cultivos</i> | <i>bosque</i> | <i>otro: ¿cuál? _____</i> |
|-----------------|---------------|---------------------------|

67.) ¿En el último año han picado las chinches a alguno de la familia?      *Sí*      *No*

68.) ¿Sintió usted alguna reacción adversa (alérgico)?      *Sí*      *No*

68a.) *¿Si dicen que sí: Por favor responda ¿Qué tipo de reacción negativa sintió?*

|                               |                           |                                           |
|-------------------------------|---------------------------|-------------------------------------------|
| <i>irritación de los ojos</i> | <i>picazón en la piel</i> | <i>asfixia o dificultad para respirar</i> |
| <i>mareo</i>                  | <i>vomito</i>             | <i>otro: ¿cuál? _____</i>                 |

69.) ¿Qué tipo de animales tienen?

|                           |               |                        |                           |              |
|---------------------------|---------------|------------------------|---------------------------|--------------|
| <i>ninguno</i>            | <i>perros</i> | <i>gallinas</i>        | <i>cerdos</i>             | <i>vacas</i> |
| <i>caballos</i>           | <i>gatos</i>  | <i>aves domésticas</i> | <i>conejos domésticos</i> |              |
| <i>otro: ¿cuál? _____</i> |               |                        |                           |              |

70.) ¿Tienen animales adentro de la casa?      *Sí*      *No*

70a.) *¿Qué tipo? \_\_\_\_\_*

71.) ¿Qué tipo de los animales silvestres ha visto cerca o dentro de su vivienda?

|                |                           |                           |                    |
|----------------|---------------------------|---------------------------|--------------------|
| <i>ninguno</i> | <i>tacuazín</i>           | <i>roedores</i>           | <i>murciélagos</i> |
| <i>palomas</i> | <i>conejos silvestres</i> | <i>cotuza</i>             | <i>venado</i>      |
| <i>cusuco</i>  | <i>gato montés</i>        | <i>otro: ¿cuál? _____</i> |                    |

71a.) *¿En cuáles de los siguientes ambientes los ha visto?*

|                          |                             |                     |                           |
|--------------------------|-----------------------------|---------------------|---------------------------|
| <i>dentro de la casa</i> | <i>alrededor de la casa</i> | <i>en el bosque</i> | <i>otro: ¿cuál? _____</i> |
|--------------------------|-----------------------------|---------------------|---------------------------|

72.) ¿En el último año ha recibido alguna visita de la unidad de salud?      *Sí*      *No*

72a.) *¿cuál fue el motivo de la visita?*

|                                 |                                                |                                   |
|---------------------------------|------------------------------------------------|-----------------------------------|
| <i>no sabe</i>                  | <i>encuestar a un habitante de la vivienda</i> | <i>fumigar</i>                    |
| <i>inspeccionar la vivienda</i> | <i>vacunación</i>                              | <i>hacer búsqueda de insectos</i> |
| <i>otro: ¿cuál? _____</i>       |                                                |                                   |

73.) ¿Usted usa mosquitero?      *Sí*      *No*

73a.) *¿cuántos tiene? \_\_\_\_\_*

74.) ¿Quién de su familia suele dormir bajo el mosquitero? \_\_\_\_\_

75.) ¿Cuánto tiempo llevas usando mosquitero? \_\_\_\_\_

Número de identificación del estudio: \_\_\_\_\_

76.) ¿Tiene algún otro método para controlar insectos dentro de su casa?      *Sí*      *No*

76a.) *Describa el método:*

**Por Equipo del Estudio: Sección 4: Trabajo de Parto, Parto y Resultados de Salud Neonata**

77.) Número de identificación del bebe en el estudio: \_\_\_\_\_

78.) Numero identificación del hospital donde nació el bebe: \_\_\_\_\_

79.) Nombre completo del bebe: \_\_\_\_\_

80.) Fecha de Nacimiento del bebe: \_\_\_\_\_

81.) Sexo del bebe:      *masculino*      *femenino*

82.) Edad gestacional: \_\_\_\_\_ Semanas \_\_\_\_\_ Días

83.) Tipo de parto:      *natural*      *cesárea*      *otro: ¿cuál?* \_\_\_\_\_

84.) Peso del bebé: \_\_\_\_\_ lb \_\_\_\_\_ oz

85.) Talla del bebé: \_\_\_\_\_ cm

86.) APGAR de neonatas(os) de minuto 1: \_\_\_\_\_

87.) APGAR de neonatas(os) de minuto 5: \_\_\_\_\_

88.) Resultado(s) del nacimiento:      *parto prematuro*      *pérdida fetal*      *otro: ¿cuál?* \_\_\_\_\_

89.) Complicaciones al momento de labor de parto/parto?:      *Sí*      *No*

*asfixia perinatal*

*sangrado excesivo*

*placentitis/villitis*

*otro: ¿cuál?* \_\_\_\_\_

90.) ¿Recibió esteroides dentro de las 24 horas posteriores de parto:      *Sí*      *No*

91.) ¿Se transfirió el(los) neonato(s) a la unidad de cuidados intensivos neonatal?      *Sí*      *No*

91a) *Si dice si, cuantos días estuvo en la unidad:* \_\_\_\_\_

92.) Fue el bebe a término (>37 semanas):      *Sí*      *No*

93.) ¿Es el bebe positivo a VIH?      *Sí*      *No*

*¿A sífilis?*      *Sí*      *No*

94.) Experimentó el bebe algunos síntomas en la primera semana de vida:      *Sí*      *No*

*fiebre*

*hepatoesplenomegalia*

*anemia*

*meningitis*

*miocarditis*

*síndrome de dificultad respiratoria*

*hidrocefalia*

*trombocitopenia*

*mala alimentación*

*erupción*

*convulsiones*

*retinitis*

*otro: ¿cuál?* \_\_\_\_\_

95.) Tiene complicaciones o diagnóstico dentro del primer mes de vida:      *Sí*      *No*

*fiebre*

*erupción*

*el síndrome de dificultad respiratoria aguda (ARDS)*

*neumonía*

*apnea*

*pérdida de la visión*

*retraso en el desarrollo*

*conducto arterioso persistente*

*Displasia broncopulmonar (BPD)*



Número de identificación del estudio: \_\_\_\_\_

otro: ¿cuál? \_\_\_\_\_

96.) Necesito soporte de oxígeno o ventilador mecánico durante el primer mes de vida: *Sí* *No*

*Cánula nasal*

*CPAP*

*ventilación mecánica*

*OMEC*

Nota(s) adicionales: \_\_\_\_\_

**Para el equipo del Estudio: Sección 5 Resultados de Pruebas**

Resultados de las pruebas por Chagas:

97. Prueba de Weiner Chagatest: *Positivo* *Negativo*

98. Prueba de ensayo rápido: *Positivo* *Negativo* *No administrada*

99. Prueba de qPCR: *Positivo* *Negativo*

99<sup>a</sup>. Carga de parásitos: \_\_\_\_\_ equivalentes de parásitos por mL (por qPCR)
